# Supplementary material for: Synthesis and properties of siloxane modified perylene bisimide discotic liquid crystals
Source: Royal Society of Chemistry journal article supplement (doi:10.1039/c3sm52054d), 2013-01-01
Supplement: c3sm52054d.pdf [file c3sm52054d.pdf]

This ESI replaces the original version published on 06 Sep 2013

### Supporting Informations

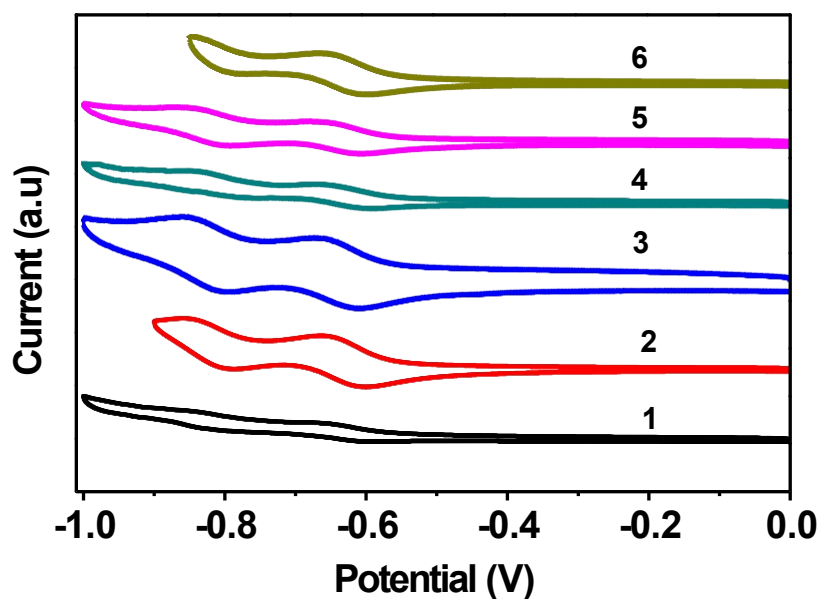

Figure S1. Cyclic voltammograms of PBICs 1-6.

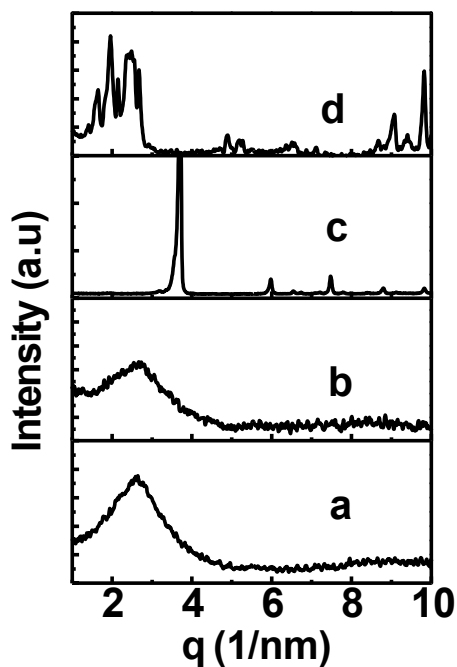

Figure S2. Temperature-dependent SAXS of PBIC 1: a. RT (isotropic); b. 220 °C (isotropic); c. cooling from 220 °C to 130 °C (hexagonal columnar phase); d. cooling from 130 °C to 50 °C (crystal).

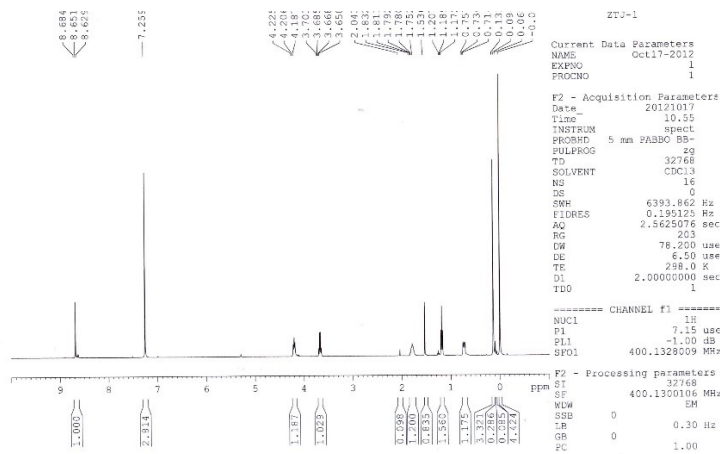

Figure S3. <sup>1</sup>H-NMR spectrum of PBICl 1.

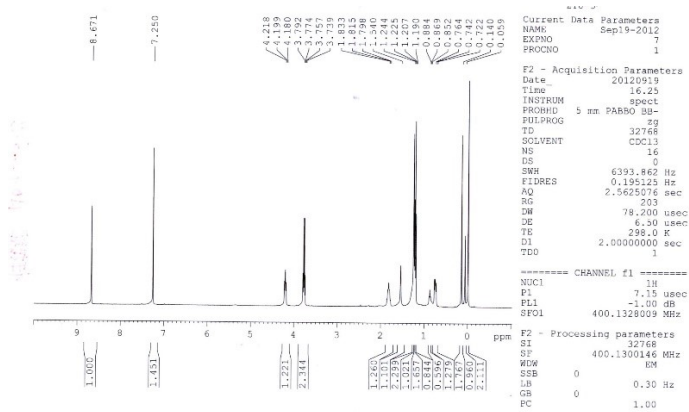

Figure S4. <sup>1</sup>H-NMR spectrum of PBICl 2.

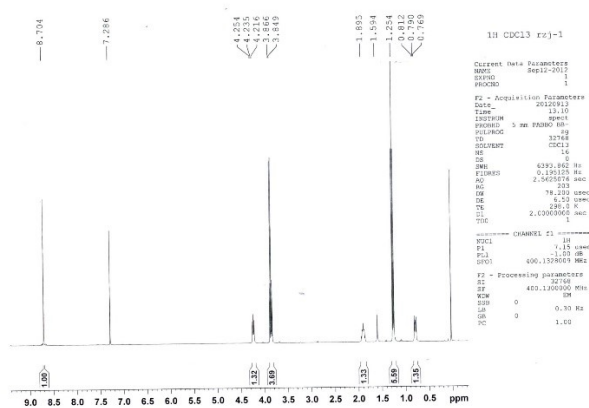

Figure S5. <sup>1</sup>H-NMR spectrum of PBICl 3.

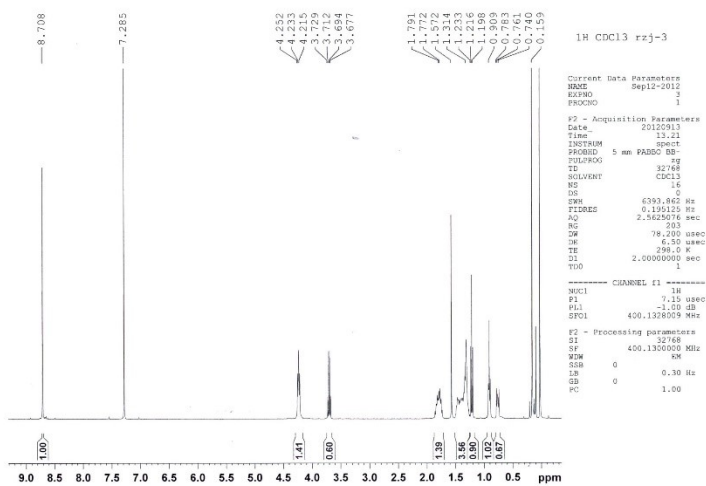

Figure S6. <sup>1</sup>H-NMR spectrum of PBIC1 4.

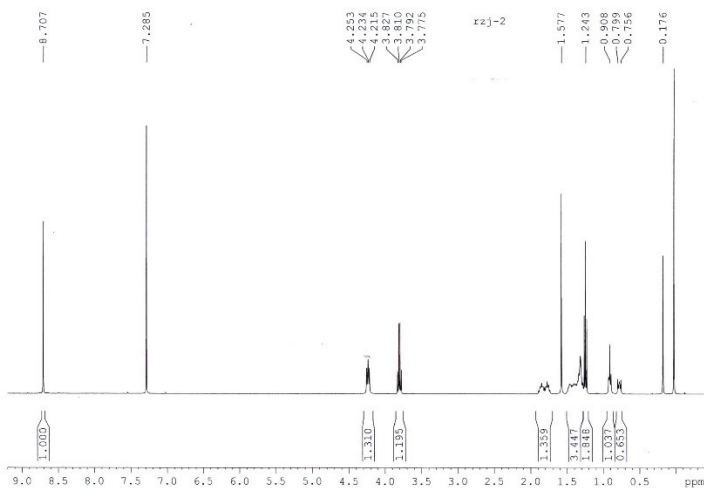

Figure S7. <sup>1</sup>H-NMR spectrum of PBIC1 5.

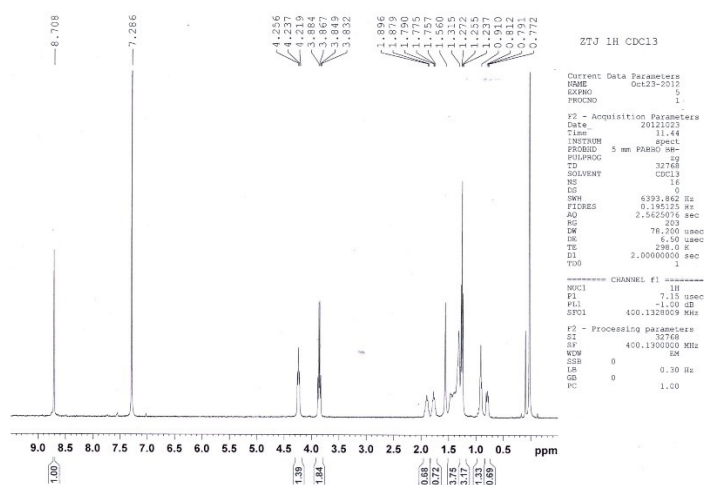

Figure S8. <sup>1</sup>H-NMR spectrum of PBIC1
